# Supplementary material
Source: PubMed Central journal article supplement (PMC3182741)
Supplement: 1108312108_pnas.201108312SI.pdf [file 1108312108_pnas.201108312SI.pdf]

# Supporting Information

Zheng and Cohn 10.1073/pnas.1108312108

## SI Methods

**Animals and Treatments.** Flutamide (120 mg/kg, 40 mg/mL, dissolved in corn oil with 1% ethanol), fulvestrant (1 mg/kg, 50 mg/mL, dissolved in ethanol and diluted 100 times in corn oil), DHT (2 mg/kg, 100 mg/mL, dissolved in ethanol diluted 100 times in corn oil), estradiol (300 µg/kg, 15 mg/mL dissolved in ethanol and diluted 100 times in corn oil), or corn oil control vehicle (corn oil with 1% ethanol) was administered by oral gavage (flutamide) or IP injection (DHT, estradiol, fulvestrant) of pregnant females from E12.5 to E15.5 once daily, except for fulvestrant which was administered at E12.5 and E14.5 to prevent induction of labor. The effect of treatment on embryos was validated by measurements of anogenital distance (Fig. S7A). Anogenital distance is a confirmed sexually dimorphic marker in rodents, is permanently affected by prenatal androgen exposure (1, 2), and is obvious as early as E15.5 (Fig. S7B). Sample sizes for pharmacological treatment groups (Fig. 3 and Figs. S3, S4, and S7) range from a minimum of  $n = 15$  to a maximum of  $n = 23$ . Wild-type sample sizes are provided in the figure legends. All animal experiments were performed in accordance with institutional guidelines.

**Quantitative RT-PCR.** Total RNA was extracted from 2D and 4D by using RNeasy plus micro kit (Qiagen), and RNA quantity ( $>100$

ng/µL) and purity ( $260/280 > 2.0$ ,  $260/230 > 1.65$ ) were determined by using a Nanodrop. RNA integrity ( $RIN > 8.5$ ) and 28S/18S ratio ( $>1.5$ ) were assessed by using a Bioanalyzer 2100 (Agilent Technologies). A quantity of 500 ng of high-quality RNA for each pooled sample ( $n = 3$ ) was converted into cDNA by using the RT<sup>2</sup> First Strand cDNA Kit (SABiosciences). Skeletogenic gene expression was determined by using the Osteogenesis PCR Array (PAMM-026; SABiosciences) and the 7900 HT Fast Real-Time PCR system (Applied Biosystems) according to the manufacturer's protocol. The complete list of genes assayed on the array can be found at the manufacturer's Web site. For other genes, expression was detected by using the CFX96 Real Time system (Bio-Rad) and QPCR system (Bio-Rad) with Actb (3) and Gapdh (4) as controls. Primers not previously published were designed by using Beacon Designer Software, except for Hoxa13, which was purchased from SABiosciences. The qRT-PCR primers designed for this study are listed in Table S2. The Web-Based PCR Array Data Analysis system (SABiosciences) was used to analyze PCR array results, and results of qRT-PCR assays not represented on the array were determined using  $\Delta\Delta C_t$  method (5).

1. Hotchkiss AK, et al. (2007) Prenatal testosterone exposure permanently masculinizes anogenital distance, nipple development, and reproductive tract morphology in female Sprague-Dawley rats. *Toxicol Sci* 96:335–345.
2. Manno FA, 3rd (2008) Measurement of the digit lengths and the anogenital distance in mice. *Physiol Behav* 93:364–368.
3. Seifert AV, Zheng Z, Ormerod BK, Cohn MJ (2010) Sonic hedgehog controls growth of external genitalia by regulating cell cycle kinetics. *Nat Commun* 1:23.
4. Crusselle-Davis VJ, Vieira KF, Zhou Z, Anantharaman A, Bungert J (2006) Antagonistic regulation of beta-globin gene expression by helix-loop-helix proteins USF and TFII-I. *Mol Cell Biol* 26:6832–6843.
5. Pfaffl MW (2001) A new mathematical model for relative quantification in real-time RT-PCR. *Nucleic Acids Res* 29:e45.
